# Supplementary material
Source: publisher figshare collection journal article supplement (https://sage.figshare.com/ndownloader/files/14802107)
Supplement: Supplementary file 1 [file 14802107]

**Table 1:** Studies included in the meta-analysis

| First author and year of publication | Country     | Study design    | Follow up | population                                 | Age range | Sex              | Sample size | Diabetes                                                                                                                                                                                                                                                            | Exposure        | outcome                                                                                              | Anxiety types in study       | Quality assessment: Risk of bias * |             |                |             |           | Results                                                                               | Pooled ratio        | Adjustment for other covariates                                                                                                                     |
|--------------------------------------|-------------|-----------------|-----------|--------------------------------------------|-----------|------------------|-------------|---------------------------------------------------------------------------------------------------------------------------------------------------------------------------------------------------------------------------------------------------------------------|-----------------|------------------------------------------------------------------------------------------------------|------------------------------|------------------------------------|-------------|----------------|-------------|-----------|---------------------------------------------------------------------------------------|---------------------|-----------------------------------------------------------------------------------------------------------------------------------------------------|
|                                      |             |                 |           |                                            |           |                  |             |                                                                                                                                                                                                                                                                     |                 |                                                                                                      |                              | Selection                          | Performance | Detection bias | Confounding | Attrition |                                                                                       |                     |                                                                                                                                                     |
| Almawi 2008                          | Bahrain     | cross-sectional | -         | Adult, with and Without Diabetes           | 31-60     | Both %63.6 women | 275         | Diagnosed based on WHO diagnostic And classification criteria                                                                                                                                                                                                       | type 2 diabetes | DASS-21score (Current Anxiety)                                                                       | -                            | Mode rate                          | Low         | Mode rate      | Low         | Low       | Odds ratio in mild anxiety 3.78 (CI 2.07-6.99), 8.14 (CI 4.11-16.12)in severe anxiety | 5.37 (CI 3.41-8.47) | age, Education, number of children perhousehold,duration of T2DM, gender, chronic disease other thanT2DM, family income, employment, smoking        |
| Bener 2011                           | Qatar       | case-control    | -         | Adults, with and Without Diabetes Mellitus | 25-65     | Both% 47.2 women | 1778        | Self-reported or taking oral medications or insulin for diabetes were considered as Having DM. WHO Expert Committee group ( fasting venous blood glucose concentration $\geq 7.0$ mmol/l and/or 2h post-OGTT venous blood glucose concentration $\geq 11.1$ mmol/L. | type 2 diabetes | Hospital Anxiety and Depression Scale (HADS) (Current Anxiety)                                       | -                            | Mode rate                          | Mode rate   | Mode rate      | Mode rate   | Low       | Odds ratio in mild anxiety 2.97 (CI 2.35-3.75), in Severe anxiety 4.57 (CI 3.53-5.91) | 3.60 (CI 3.03-4.28) | matched case-control for age, gender and ethnicity                                                                                                  |
| Bouwman 2010                         | Netherlands | Cross-sectional | -         | Adults , with and Without type 2 diabetes  | 40–65     | Both% 52.7 women | 2667        | Clinical assessment, WHO diagnostic And classification criteria Type 2 diabetes was defined as FPG $\geq 7.0$ mmol/l or 2hrPG $\geq 11.1$ mmol/L.                                                                                                                   | type 2 diabetes | Hospital Anxiety and Depression Scale – Anxiety Subscale (HADS-A, score $\geq 8$ ) (Current Anxiety) | -                            | Mode rate                          | Low         | Mode rate      | Mode rate   | low       | Odds ratio in men 1.58 (CI 0.82-3.06), in women 1.36 (0.74–2.51)                      | 1.45 (CI 0.93-2.28) | age, education and family history of diabetes, triglycerides, HDL cholesterol, and total cholesterol, hypertension, smoking and waist circumference |
| Deschênes 2015                       | Canada      | cross-sectional | -         | Adults , with and Without diabetes         | 30-70     | women            | 17623       | self-reported                                                                                                                                                                                                                                                       | Unknown         | World Mental Health—Composite International Diagnostic Interview 3.0 (WMH-CIDI)                      | Generalized anxiety disorder | Low                                | Mode rate   | Mode rate      | Low         | Moderate  | Odds ratio generalized anxiety disorder 1.57 (CI 0.92-2.66)                           | 1.57 (CI 0.92-2.66) | age, gender, race, education, marital status, smoking status, alcohol consumption frequency, and BMI                                                |

|                  |             |                    |                              |                                           |           |                   |        |                                                                                                                                                                                                 |                 |                                                                                                                                                                                                                               |                                                   |           |           |           |           |          |                                                                                    |                     |                                                                                           |
|------------------|-------------|--------------------|------------------------------|-------------------------------------------|-----------|-------------------|--------|-------------------------------------------------------------------------------------------------------------------------------------------------------------------------------------------------|-----------------|-------------------------------------------------------------------------------------------------------------------------------------------------------------------------------------------------------------------------------|---------------------------------------------------|-----------|-----------|-----------|-----------|----------|------------------------------------------------------------------------------------|---------------------|-------------------------------------------------------------------------------------------|
|                  |             |                    |                              |                                           |           |                   |        |                                                                                                                                                                                                 |                 | according to the Diagnostic and Statistical Manual of Mental Disorders, (12- month prevalence )                                                                                                                               |                                                   |           |           |           |           |          |                                                                                    |                     |                                                                                           |
| Van Dooren 2016  | Netherlands | cross-sectional    | -                            | Adults , with and without type 2 diabetes | 40-75     | Both 45.2 % women | 862    | by an oral glucose tolerance test, is defined according to the WHO 2006 criteria, for type 2 diabetes fasting plasma glucose of $\geq 7.0$ mmol/L or a 2-h plasma glucose of $\geq 11.1$ mmol/L | type 2 diabetes | Mini-International Neuropsychiatric Interview (MINI) according to the DSM-IV, 7-item Generalized Anxiety Disorder scale (GAD-7), (Current anxiety)                                                                            | Generalized anxiety disorder                      | Mode rate | Low       | Mode rate | Mode rate | Low      | Odds ratio in GAD-7 score 1.03 (CI 0.99-1.08), GAD-7 $\geq 10$ 1.50 (CI 0.72-3.12) | 1.03 (CI 0.98-1.07) | age, sex and education level                                                              |
| El-Gabalawy 2011 | Canada      | cross-sectional    | -                            | Adults, with and without diabetes         | 55-older  | Both 53.2 % women | 12,792 | Self-report                                                                                                                                                                                     | Unknown         | World Mental-Health Composite International Diagnostic Interview (CIDI) based on Diagnostic and Statistical Manual of Mental Disorders, clinician-administered structured clinical interview diagnoses (12-month prevalence ) | Panic disorder . Agoraphobia, social phobia, PTSD | Mode rate | Mode rate | Mode rate | Low       | Moderate | Odds ratio 1.23 (CI 0.90-1.67)                                                     | 1.23 (CI 0.90-1.67) | sex, age, education, marital status, income, mood disorder and any substance use disorder |
| Gale 2011        | UK          | Prospective cohort | First study 54 years, second | older people,                             | $\geq 60$ | Both 41 % women   | 5570   | Self-report                                                                                                                                                                                     | unknown         | Hospital Anxiety Scale                                                                                                                                                                                                        | -                                                 | Low       | Mode rate | Mode rate | Mode rate | Moderate | ABC men: 1.77 (0.49–6.32)                                                          | 1.32 (CI 1.03-1.68) | Childhood social class, current                                                           |

|              |     |                 |                                                                                   |                                   |       |                                               |      |             |         |                                                                                                       |                                                                                                            |           |           |           |     |          |                                                                                                                                                                                                                                                 |                     |                                                                   |
|--------------|-----|-----------------|-----------------------------------------------------------------------------------|-----------------------------------|-------|-----------------------------------------------|------|-------------|---------|-------------------------------------------------------------------------------------------------------|------------------------------------------------------------------------------------------------------------|-----------|-----------|-----------|-----|----------|-------------------------------------------------------------------------------------------------------------------------------------------------------------------------------------------------------------------------------------------------|---------------------|-------------------------------------------------------------------|
|              |     |                 | study 20 years, third study 64 years, fourth study 73 years, fifth study 69 years | with and without diabetes         |       |                                               |      |             |         | (Current Anxiety)                                                                                     |                                                                                                            |           |           |           |     |          | ABC women: 4.95 (0.94–26.21)<br>CaPS men: 1.15 (0.69–1.91)<br>HAS men: 0.94 (0.36–2.46)<br>HAS women: 1.20 (0.38–3.81), HCS men 1.54 (0.98-2.41), HCS women 1.13 (0.69-1.84), LBC men: 0.99 (0.21–4.66)<br>LBC women: 1.80 (0.63–5.20)          |                     | social class, BMI, flamingo stand time, Grip strength, disability |
| Goodwin 2005 | USA | cross-sectional | -                                                                                 | Adults, with and without diabetes | 15–54 | Both 58.2% in diabetes , 52.4% in no diabetes | 5877 | Self-report | unknown | World Health Organization (WHO) Composite International Diagnostic Interview, (12- month prevalence ) | Specific phobia, Social phobia, Agoraphobia, Panic attacks, Panic disorder , Posttraumatic stress disorder | Mode rate | Mode rate | Mode rate | Low | Moderate | Odds ratio<br>Specific phobia 1.43 (CI 0.72-2.86), Social phobia 1.68 (CI 0.79-3.58), Agoraphobia 2.17 (CI 0.89-9.53), Panic attacks 1.47 (CI 0.67-3.25), Panic disorder 1.46 (CI 0.47-4.06), Posttraumatic stress disorder2.30 (CI 1.02-5.21), | 1.68 (CI 1.19-2.36) | age, sex, race, marital status, education, and income             |

|                |              |                 |   |                                   |                                                                                   |                                                         |        |                                                                                                |                     |                                                                                                                                                                                                                                |                                                                      |           |     |           |           |          |                                                                                                                                                                                |                     |                                                                                                                                  |
|----------------|--------------|-----------------|---|-----------------------------------|-----------------------------------------------------------------------------------|---------------------------------------------------------|--------|------------------------------------------------------------------------------------------------|---------------------|--------------------------------------------------------------------------------------------------------------------------------------------------------------------------------------------------------------------------------|----------------------------------------------------------------------|-----------|-----|-----------|-----------|----------|--------------------------------------------------------------------------------------------------------------------------------------------------------------------------------|---------------------|----------------------------------------------------------------------------------------------------------------------------------|
| Kruse 2003     | Germany      | cross-sectional | - | Adults, with and without diabetes | 18–79                                                                             | Both 43% women in diabetes, 49.9% in control            | 4181   | self-reported                                                                                  | type 1 & 2 diabetes | Composite International Diagnostic Screener (CID-S) for mental disorders, panic disorder, agoraphobia, social phobia, simple phobia, generalized anxiety disorder, obsessive-compulsive disorders (1-month prevalence)         | Agoraphobia, GAD, OCD, panic disorders, simple phobia, social phobia | Mode rate | Low | Mode rate | Mode rate | Moderate | Odds ratio 2.05 (CI 1.22-2.43)                                                                                                                                                 | 2.05 (CI 1.22-2.43) | age, sex, socioeconomic status, and family status                                                                                |
| Lin 2008       | 17 countries | cross-sectional | - | Adults, with and without diabetes | Age range ≥18, except for Colombia, Mexico (18–65), Japan (≥20), and Israel (≥21) | Both 52% women                                          | 42,697 | self-reported                                                                                  | unknown             | WHO Composite International Diagnostic Interview, Disorders were assessed using the definitions and criteria of the Diagnostic and Statistical Manual of Mental Disorders, Fourth Edition (DSM-IV, SCID), (1-month prevalence) | Agoraphobia or panic disorder GAD, PTSD, social phobia               | Mode rate | Low | Mode rate | Low       | Moderate | Odds ratio in Generalized anxiety 1.60 (CI 1.30-2.00), in Agoraphobia or panic disorder 1.50 (CI 1.10-1.90), in Social phobia 1.30 (CI 1.10-1.60), in PTSD 1.30 (CI 1.10-1.80) | 1.41 (CI 1.26-1.57) | age–gender                                                                                                                       |
| Lukaschek 2013 | Germany      | cross-sectional | - | Adults, with and without diabetes | 32–81                                                                             | Both 40.5% women with T2D, 53.0% women with Prediabetes | 2970   | Clinical assessment, was defined as a validated physician diagnosis or current use of glucose- | type 2 diabetes     | assessed in a personal interview using the Generalised Anxiety Disorder-7 (GAD-7),                                                                                                                                             | PTSD                                                                 | Mode rate | Low | Mode rate | Low       | Moderate | Odds ratio in PTSD 3.56 (CI 1.43-8.52)                                                                                                                                         | 3.56 (CI 1.43-8.52) | Age, sex, family status, educational level, obesity, smoking, depression, depressed mood/exhaustion, anxiety, somatic complaints |

|             |               |                        |          |                                                |         |                                                                                 |         |                                                                             |                        |                                                                                                                                                      |                                                                                                                                                                    |              |              |              |              |              |                                                                                                                                                                                          |                            |                                                                                                                                                                                                                                                 |
|-------------|---------------|------------------------|----------|------------------------------------------------|---------|---------------------------------------------------------------------------------|---------|-----------------------------------------------------------------------------|------------------------|------------------------------------------------------------------------------------------------------------------------------------------------------|--------------------------------------------------------------------------------------------------------------------------------------------------------------------|--------------|--------------|--------------|--------------|--------------|------------------------------------------------------------------------------------------------------------------------------------------------------------------------------------------|----------------------------|-------------------------------------------------------------------------------------------------------------------------------------------------------------------------------------------------------------------------------------------------|
|             |               |                        |          |                                                |         | tes,<br>45.5%<br>women<br>with<br>non-<br>diabetic<br>conditio<br>ns            |         | lowering<br>agent                                                           |                        | (current<br>Anxiety)                                                                                                                                 |                                                                                                                                                                    |              |              |              |              |              |                                                                                                                                                                                          |                            |                                                                                                                                                                                                                                                 |
| Petrak 2003 | German<br>y   | Case-<br>control       | -        | Adults,<br><br>with and<br>without<br>diabetes | 17–40   | Both<br>37.7%<br>women<br>with<br>T1D,<br>49.2%<br>women<br>without<br>diabetes | 2359    | diagnosed by<br>general<br>practitioners<br>and<br>confirmed in<br>hospital | type 1<br>diabetes     | structured<br>interview<br>using<br>interviews<br>designed<br>to provide<br>diagnoses<br>according<br>to DSM-<br>IV, (1-<br>month<br>prevalence<br>) | Agoraph<br>obia<br>with/wit<br>hout<br>panic,<br>GAD,<br>OCD,<br>panic<br>with/<br>without<br>agoraph<br>obia,<br>simple<br>Phobia,<br>social<br>phobia.           | Mode<br>rate | Low          | Mode<br>rate | Low          | Moderat<br>e | Odds ratio in<br>PTSD 0.8 (CI<br>0.5-1.70),<br>Agoraphobia<br>with/without<br>panic 1.70<br>(CI 0.5-5.00),<br>Simple<br>phobia 0.60<br>(CI 0. 2-<br>1.40),                               | 0.85 (CI<br>0.53-<br>1.36) | gender, age, body-<br>mass-index, marital<br>status, years of formal<br>education                                                                                                                                                               |
| Strine 2008 | USA           | cross-<br>sectional    | -        | Adults<br><br>with and<br>without<br>diabetes  | 18-55   | Both<br>52%<br>women                                                            | 217,379 | Self-report                                                                 | unknown                | single<br>question of<br>lifetime<br>anxiety<br>(lifetime<br>anxiety)                                                                                | Acute<br>stress<br>disorder<br>,<br>anxiety,<br>GAD,<br>OCD,<br>panic<br>attacks,<br>panic<br>disorder<br>, phobia,<br>PTSD,<br>social<br>anxiety<br>disorder<br>. | Mode<br>rate | Mode<br>rate | Mode<br>rate | Low          | Moderat<br>e | Odds ratio in<br>Lifetime<br>diagnosis of<br>anxiety 1.2<br>(CI 1.1-1.4),                                                                                                                | 1.2 (CI<br>1.1-1.4)        | age, sex, race and<br>ethnicity, education,<br>marital status,<br>employment status,<br>cardiovascular disease<br>status, diabetesstatus,<br>asthma status,<br>smoking status,<br>physical inactivity,<br>obesity, and heavy<br>drinking status |
| Hasan 2015  | Australi<br>a | Prospecti<br>ve-cohort | 27 years | Adults,<br>with and<br>without<br>diabetes     | unknown | women                                                                           | 2791    | self-reported                                                               | Type 1 &<br>2 diabetes | Composite<br>Internation<br>al<br>Diagnostic<br>Interview<br>(CIDI)<br>according<br>to the<br>DSM-IV,<br>(lifetime<br>anxiety)                       | GAD,<br>panic<br>disorder<br>,<br>specific<br>phobias<br>(e.g.,<br>social<br>phobia),<br>and<br>posttrau<br>matic<br>stress<br>disorder<br>(PTSD)                  | Mode<br>rate | Mode<br>rate | Mode<br>rate | Mode<br>rate | Moderat<br>e | Odds ratio in<br>Lifetime<br>GAD 1.19<br>(CI 0.76-<br>1.85),<br>Lifetime<br>Panic<br>disorder 1.15<br>(CI 0.86-<br>1.53),<br>Lifetime<br>Specific<br>phobias 1.31<br>(CI 0.91-<br>1.89), | 1.26 (CI<br>1.06-<br>1.50) | age, education, income,<br>marital status, body<br>mass index, alcohol<br>consumption, and<br>smoking                                                                                                                                           |

|                 |             |                 |   |                                         |       |                  |         |                     |                     |                                                                                                   |                                                                                |           |           |           |           |          |                                                                                                                     |                     |                                                                                                                  |
|-----------------|-------------|-----------------|---|-----------------------------------------|-------|------------------|---------|---------------------|---------------------|---------------------------------------------------------------------------------------------------|--------------------------------------------------------------------------------|-----------|-----------|-----------|-----------|----------|---------------------------------------------------------------------------------------------------------------------|---------------------|------------------------------------------------------------------------------------------------------------------|
|                 |             |                 |   |                                         |       |                  |         |                     |                     |                                                                                                   |                                                                                |           |           |           |           |          | Lifetime PTSD 1.42 (CI 1.01-2.02)                                                                                   |                     |                                                                                                                  |
| Wu 2015         | USA         | cross-sectional | - | Adults, with and without diabetes       | 18–90 | Both 57.5% women | 170,853 | Clinical assessment | T2DM                | ICD-9-CM diagnosis code corresponding to a DSM-IV-TR diagnosis code, (Current anxiety)            | panic, generalized anxiety, phobia, obsessive-compulsive, posttraumatic stress | Low       | Low       | Mode rate | Mode rate | Moderate | Odds ratio in anxiety disorder 1.12 (CI 1.06-1.19),                                                                 | 1.12 (CI 1.06-1.19) | age, sex, race and ethnicity                                                                                     |
| Holt 2009       | UK          | cross-sectional | - | Adults, with and without diabetes       | 59–73 | Both 47.5% women | 2997    | Clinical assessment | unknown             | Hospital Anxiety and Depression Scale (HADS) (Current Anxiety)                                    | -                                                                              | Mode rate | Low       | Mode rate | Mode rate | Moderate | Odds ratio anxiety In men 1.15 (CI 0.71-1.84), 1.36 (CI 0.89-2.10) in women                                         | 1.26 (CI 0.91-1.73) | Age, BMI, smoking, social class and alcohol consumption                                                          |
| Bodenlos 2009   | USA         | cross-sectional | - | Adults, with and without diabetes       | ≥18   | Both 56% women   | 4476    | Self-reported       | unknown             | Composite International Diagnostic Interview (CIDI) according to the DSM-IV (12-month prevalence) | -                                                                              | Low       | Mode rate | Mode rate | Low       | Moderate | Social phobia: 2.03 (1.0–4.14) GAD: 0.85 (0.33–2.19) Panic disorder: 1.33 (0.72–2.46) Agoraphobia: 2.03 (1.60–3.89) | 1.67 (CI 1.23-2.27) | Age, gender, race, income, education and smoking status                                                          |
| Das-Munshi 2007 | UK          | cross-sectional | - | adults, with and without diabetes       | 16–74 | Both 50% women   | 8580    | Self-report         | unknown             | Clinical interview Schedule (1-month prevalence)                                                  | GAD, OCD, panic disorder, phobias                                              | Mode rate | Mode rate | Mode rate | Low       | Moderate | Odds ratio anxiety 1.20 (CI 0.70-2.00)                                                                              | 1.20 (CI 0.70-2.00) | Age, gender, ethnicity, socioeconomic status, impairment on activities of daily living and physical co-morbidity |
| de Winter 2015  | Netherlands | cross-sectional | - | older people, with and without diabetes | 50>   | Both 48.7% women | 990     | Clinical assessment | Type 1 & 2 diabetes | screening instruments of Anxiety, Depression, And Mood Scale                                      | -                                                                              | Mode rate | Low       | Mode rate | Mode rate | Moderate | Odds ratio 2.4(CI 1.2-4.9)                                                                                          | 2.4(CI 1.2-4.9)     | unadjusted                                                                                                       |

|            |                 |                          |         |                                            |                                                                                          |                        |        |                                           |                     |                                                                                                                                                                     |                                                                                             |              |     |              |      |              |                                       |                        |                                                                                                                                                                                                  |
|------------|-----------------|--------------------------|---------|--------------------------------------------|------------------------------------------------------------------------------------------|------------------------|--------|-------------------------------------------|---------------------|---------------------------------------------------------------------------------------------------------------------------------------------------------------------|---------------------------------------------------------------------------------------------|--------------|-----|--------------|------|--------------|---------------------------------------|------------------------|--------------------------------------------------------------------------------------------------------------------------------------------------------------------------------------------------|
|            |                 |                          |         |                                            |                                                                                          |                        |        |                                           |                     | (ADAMS),<br>Glasgow<br>Anxiety<br>Scale,<br>Anxiety<br>sub-scale<br>of the<br>Hospital<br>Anxiety<br>and<br>Depression<br>Scale<br>(HADS-A)<br>(Current<br>anxiety) |                                                                                             |              |     |              |      |              |                                       |                        |                                                                                                                                                                                                  |
| Tu 2017    | Taiwan          | retrospect<br>ive cohort | 10years | Adults,<br>with and<br>without<br>diabetes | 20-80                                                                                    | Both<br>51.5%<br>women | 778123 | Clinical<br>assessment                    | type 2<br>diabetes  | Internation<br>al<br>Classificati<br>on of<br>Diseases,<br>Ninth<br>Revision,<br>Clinical<br>Modificati<br>on (ICD-9-<br>CM),<br>(Current<br>anxiety)               | -                                                                                           | Low          | Low | Low          | High | Low          | Odds ratio<br>1.81(CI 1.76-<br>1.85)  | 1.81(CI<br>1.76-1.85)  | unadjusted                                                                                                                                                                                       |
| Shahi 2017 | Iran            | Case-<br>control         | -       | Adults,<br>with and<br>without<br>diabetes | Mean=<br>57.84<br>SD=10.46<br>in<br>diabetes,<br>mean=<br>54.87<br>SD=9.46<br>in control | Both<br>50%<br>women   | 120    | Clinical<br>assessment                    | type 2<br>diabetes  | Depression<br>, anxiety<br>and stress<br>scale<br>(DASS),<br>(Current<br>anxiety)                                                                                   | -                                                                                           | Mode<br>rate | Low | Mode<br>rate | High | Moderat<br>e | Odds ratio<br>0.26(CI 0.13-<br>0.52)* | 0.26(CI<br>0.13-0.52)* | unadjusted                                                                                                                                                                                       |
| Yoong 2017 | Singapo<br>re   | RCT                      | -       | Adults,<br>with and<br>without<br>diabetes | age≥21                                                                                   | Both<br>59%<br>women   | 526    | Clinical<br>assessment                    | Type 1 or<br>Type 2 | Hospital<br>Anxiety<br>and<br>Depression<br>Scale<br>(HADS),<br>(Current<br>anxiety)                                                                                | -                                                                                           | Low          | Low | Mode<br>rate | Low  | Moderat<br>e | Odds ratio<br>1.33(CI 0.91-<br>1.93)  | 1.33(CI<br>0.91-1.93)  | matched case-control<br>for age, on<br>hemodialysis for a<br>minimum of 3 months,<br>language, cognitive,<br>major visual or<br>auditory impairments<br>and life-limiting<br>condition diagnosis |
| Meurs 2016 | Netherl<br>ands | Prospecti<br>ve-cohort   | 7 years | Adults,<br>with and<br>without<br>diabetes | Mean=<br>45.5<br>SD=0.75                                                                 | Both<br>59%<br>women   | 90,686 | Clinical<br>assessment &<br>Self-reported | Unknown             | Mini-<br>Internation<br>al<br>Neuropsych<br>iatric<br>Interview,<br>(Current<br>anxiety)                                                                            | panic<br>disorder<br>,<br>agoraph<br>obia,<br>social<br>anxiety<br>disorder<br>, and<br>GAD | Low          | Low | Mode<br>rate | Low  | Moderat<br>e | Odds ratio<br>1.42 (CI<br>1.22-1.65)  | 1.42 (CI<br>1.22-1.65) | age, sex, r comorbidity<br>and depressive disorder                                                                                                                                               |

\*Odd ratio calculated by authors
